# Supplementary material
Source: PubMed Central journal article supplement (PMC5766405)
Supplement: NIHMS926248-supplement.pdf [file NIHMS926248-supplement.pdf]

# Supplementary Tables

Casasent et al. 2017

Supplementary Tables 1-6.....Pages 2-7

**Table S1. Related to Subject Details. Synchronous DCIS-IDC Patient Cohort.**

| Patient | Age | TNBC | ER  | PR  | HER2 | grade | Stage | Cells |
|---------|-----|------|-----|-----|------|-------|-------|-------|
| P1      | 57  | Y    | -/- | -/- | -/-  | 3/3   | IIB   | 57    |
| P2      | 36  | N    | +/+ | +/+ | +/+  | 3/3   | IIB   | 114   |
| P3      | 64  | N    | +/+ | +/+ | -/-  | 1/1   | IV    | 102   |
| P4      | 66  | N    | +/+ | +/+ | -/-  | 2/2   | IIIC  | 104   |
| P5      | 47  | N    | +/+ | -/- | -/-  | 3/3   | IIA   | 148   |
| P6      | 77  | Y    | -/- | -/- | -/-  | 3/3   | IIA   | 204   |
| P7      | 66  | N    | -/+ | -/- | -/-  | 3/3   | IIIC  | 112   |
| P8      | 62  | Y    | -/- | -/- | -/-  | 3/3   | IIA   | 235   |
| P9      | 49  | Y    | -/- | -/- | -/-  | 3/3   | IIA   | 96    |
| P10     | 48  | Y    | -/- | -/- | -/-  | 3/3   | IIA   | 122   |

This table contains clinical information on the 10 patients with synchronous DCIS-IDC tumors that were analyzed by single cell and exome sequencing. Clinical parameters listed include patient age, triple-negative breast cancer status, estrogen, progesterone and HER2 receptor status, tumor grade and tumor stage. The receptor status and grade were scored independently for the DCIS and IDC regions and are displayed on the left (DCIS) and right-hand (IDC) side in these columns. The total number of single cells analyzed by TSCS is also indicated in the last column.

**Table S2. Related to Figures 6-7. Exome Sequencing Metrics.**

| Patient | Normal |         | In situ |         | Invasive |         |
|---------|--------|---------|---------|---------|----------|---------|
|         | Depth  | Breadth | Depth   | Breadth | Depth    | Breadth |
| P1      | 107    | 0.9599  | 116     | 0.9628  | 58       | 0.9626  |
| P2      | 76     | 0.9601  | 142     | 0.9553  | 124      | 0.9536  |
| P3      | 100    | 0.9587  | 187     | 0.9665  | 116      | 0.9597  |
| P4      | 153    | 0.9543  | 136     | 0.9538  | 140      | 0.9524  |
| P5      | 104    | 0.9571  | 46      | 0.9458  | 125      | 0.9526  |
| P6      | 87     | 0.9558  | 180     | 0.9607  | 89       | 0.9539  |
| P7      | 177    | 0.9552  | 211     | 0.9561  | 136      | 0.9501  |
| P8      | 144    | 0.9584  | 315     | 0.965   | 105      | 0.9577  |
| P9      | 280    | 0.9638  | 335     | 0.9635  | 298      | 0.9621  |
| P10     | 213    | 0.9608  | 287     | 0.9628  | 110      | 0.9528  |
| Mean    | 144.1  | 0.95841 | 195.5   | 0.95923 | 130.1    | 0.95575 |

This table shows the exome sequencing metrics for the 10 DCIS-IDC patients, in which laser-capture-microdissection was used to isolate in situ and invasive regions from frozen tissue sections. Matched normal breast tissue was sequenced in parallel. Coverage depth was calculated for the in situ regions (mean=195.5X, SEM=29.4), invasive regions (mean=130.1X, SEM=20.1) and normal tissues (mean=144X, SEM=20.3). Coverage breadth, or physical coverage, was also calculated from the targeted exon regions for each patient and tissue region. Coverage breadth is defined as the percentage of the targeted capture regions in which at least 1X coverage depth was achieved after sequencing.

**Table S3. Related to Figures 6-7. Invasive-Specific Mutations.**

| Patient | Gene   | Chr   | Position  | Ref | Var | nucleotide | AA     | Validated     | SITU_FQ | INV_FQ | POLY | SIFT | genbank ID   |
|---------|--------|-------|-----------|-----|-----|------------|--------|---------------|---------|--------|------|------|--------------|
| P3      | CRY1   | chr12 | 107395083 | C   | T   | G659A      | R220H  | Invasive Only | 0.01    | 0.52   | 0.91 | 0    | NM_004075    |
| P3      | DRD1   | chr5  | 174869715 | G   | A   | C388T      | R130W  | Invasive Only | 0.00    | 0.47   | 0.98 | 0    | NM_000794    |
| P4      | TECRL  | chr4  | 65274856  | G   | A   | C214T      | Q72X   | Invasive Only | 0.00    | 0.27   | 0.74 | 0.66 | NM_001010874 |
| P7      | FAP    | chr2  | 163070565 | C   | G   | G885C      | W295C  | Not Tested    | 0.00    | 0.22   | 1    | 0.09 | NM_004460    |
| P7      | SCN4A  | chr17 | 62025343  | G   | C   | C3225G     | I1075M | Invasive Only | 0.00    | 0.08   | NA   | 0    | NM_000334    |
| P7      | PCDHA5 | chr5  | 140201856 | C   | G   | C496G      | Q166E  | Invasive Only | 0.00    | 0.08   | 0.52 | 0.02 | NM_031501    |
| P8      | AKAP6  | chr14 | 33242950  | C   | G   | C3439G     | L1147V | Invasive Only | 0.01    | 0.46   | 0.87 | 0    | NM_004274    |
| P8      | SORBS2 | chr4  | 186541289 | T   | A   | A696T      | R232S  | Invasive Only | 0.01    | 0.71   | 0.71 | 0    | NM_001145675 |
| P8      | FANCA  | chr16 | 89815132  | A   | T   | T3283A     | F1095I | Not Tested    | 0.00    | 0.38   | 0.96 | 0.42 | NM_001286167 |
| P8      | CEP192 | chr18 | 13071040  | T   | A   | T5177A     | I1726N | Not Tested    | 0.00    | 0.38   | 0.92 | NA   | NM_032142    |
| P8      | TRIM47 | chr17 | 73872438  | C   | A   | G907T      | D303Y  | Not Tested    | 0.00    | 0.62   | 0.98 | 0.02 | NM_033452    |

This table lists the invasive-specific nonsynonymous mutations that were identified by exome sequencing of laser-capture-microdissected tissue regions. The mutations listed were detected in the invasive regions and were not detected in the in situ region, after filtering by matched normal germline variants. The table lists the following columns in order: patient identifiers, gene names, chromosome and position, reference nucleotide, variant nucleotide, nucleotide position in gene, amino acid positions (AA), amplicon deep-sequencing validation status, in situ mutation frequencies (SITU\_FQ) normalized by tumor purity, invasive mutation frequencies (INV\_FQ) normalized by tumor purity, polyphen2 damaging impact scores (POLY), SIFT functional impact prediction scores, and GenBank identifiers.sequencing.

**Table S4. Related to Figures 6-7. Targeted Amplicon Deep Sequencing.**

| Patient | Gene     | Chr   | Position  | Ref | Var | Type     | A      | C       | G       | T      | SITU_MF | INV_MF | NORM_MF | P-value DN      | P-value IN      | Validated      |
|---------|----------|-------|-----------|-----|-----|----------|--------|---------|---------|--------|---------|--------|---------|-----------------|-----------------|----------------|
| P3      | DRD1     | chr5  | 174869715 | G   | A   | in situ  | 72     | 9       | 52208   | 123    | 0.00    | 0.14   | 0.01    | 2.7211E-02      | 1.7892E-03      | INV ONLY       |
|         |          |       |           |     |     | Invasive | 1666   | 1       | 10190   | 45     |         |        |         |                 |                 |                |
|         |          |       |           |     |     | Normal   | 75     | 4       | 14579   | 35     |         |        |         |                 |                 |                |
| P3      | CRY1     | chr12 | 107395083 | C   | T   | in situ  | 503    | 128175  | 11      | 245    | 0.00    | 0.15   | 0.00    | Not Significant | 1.3216E-03      | INV ONLY       |
|         |          |       |           |     |     | Invasive | 59     | 11798   | 4       | 2161   |         |        |         |                 |                 |                |
|         |          |       |           |     |     | Normal   | 76     | 10319   | 1       | 38     |         |        |         |                 |                 |                |
| P4      | TECRL    | chr4  | 65274856  | G   | A   | in situ  | 9770   | 171     | 4214428 | 1993   | 0.00    | 0.12   | 0.00    | 1.9430E-18      | 3.2333E-03      | INV ONLY       |
|         |          |       |           |     |     | Invasive | 62     | 0       | 464     | 0      |         |        |         |                 |                 |                |
|         |          |       |           |     |     | Normal   | 0      | 1       | 556     | 0      |         |        |         |                 |                 |                |
| P4      | MYO18A   | chr17 | 27423866  | T   | A   | in situ  | 276279 | 541     | 1033    | 569662 | 0.33    | 0.23   | 0.00    | 1.9430E-18      | 2.0994E-04      | Pre-existing   |
|         |          |       |           |     |     | Invasive | 14452  | 26      | 93      | 47125  |         |        |         |                 |                 |                |
|         |          |       |           |     |     | Normal   | 114    | 13      | 99      | 59998  |         |        |         |                 |                 |                |
| P4      | ZBTB14   | chr18 | 5291971   | T   | A   | in situ  | 2815   | 19      | 90      | 89006  | 0.03    | 0.17   | 0.00    | 2.1105E-06      | 5.1415E-12      | Pre-existing   |
|         |          |       |           |     |     | Invasive | 25     | 0       | 4       | 121    |         |        |         |                 |                 |                |
|         |          |       |           |     |     | Normal   | 1      | 0       | 9       | 5430   |         |        |         |                 |                 |                |
| P4      | MYO18B   | chr22 | 26239717  | G   | A   | in situ  | 480489 | 780     | 925921  | 754    | 0.34    | 0.08   | 0.00    | 3.3535E-21      | 4.2214E-04      | Pre-existing   |
|         |          |       |           |     |     | Invasive | 7491   | 48      | 81899   | 148    |         |        |         |                 |                 |                |
|         |          |       |           |     |     | Normal   | 113    | 43      | 128978  | 37     |         |        |         |                 |                 |                |
| P7      | PCDHA5   | chr5  | 140201856 | C   | G   | in situ  | 575    | 929093  | 81      | 191    | 0.00    | 0.08   | 0.00    | 2.0250E-02      | 1.4055E-04      | INV ONLY       |
|         |          |       |           |     |     | Invasive | 111    | 28932   | 2373    | 31     |         |        |         |                 |                 |                |
|         |          |       |           |     |     | Normal   | 126    | 86789   | 28      | 18     |         |        |         |                 |                 |                |
| P7      | SCN4A    | chr17 | 62025343  | G   | C   | in situ  | 63     | 194     | 404521  | 567    | 0.00    | 0.08   | 0.00    | 2.4231E-05      | 1.4316E-03      | INV ONLY       |
|         |          |       |           |     |     | Invasive | 37     | 12095   | 145897  | 442    |         |        |         |                 |                 |                |
|         |          |       |           |     |     | Normal   | 12     | 246     | 100712  | 80     |         |        |         |                 |                 |                |
| P7      | ARHGAP36 | chrX  | 130217875 | C   | T   | in situ  | 32     | 14378   | 16      | 1244   | 0.08    | 0.00   | 0.00    | 1.0944E-04      | Not Significant | DCIS ONLY      |
|         |          |       |           |     |     | Invasive | 7      | 11738   | 13      | 20     |         |        |         |                 |                 |                |
|         |          |       |           |     |     | Normal   | 1      | 2693    | 3       | 9      |         |        |         |                 |                 |                |
| P7      | ABCC11   | chr16 | 48226526  | G   | T   | in situ  | 39     | 20      | 81322   | 3933   | 0.05    | 0.06   | 0.00    | 1.1563E-11      | 1.4828E-03      | Pre-existing   |
|         |          |       |           |     |     | Invasive | 76     | 24      | 231953  | 15359  |         |        |         |                 |                 |                |
|         |          |       |           |     |     | Normal   | 54     | 23      | 185477  | 502    |         |        |         |                 |                 |                |
| P7      | MBL2     | chr10 | 54530499  | G   | A   | in situ  | 18229  | 58      | 117956  | 423    | 0.13    | 0.01   | 0.01    | 3.3084E-08      | Not Significant | DCIS ONLY      |
|         |          |       |           |     |     | Invasive | 2372   | 48      | 212951  | 538    |         |        |         |                 |                 |                |
|         |          |       |           |     |     | Normal   | 191    | 4       | 16598   | 28     |         |        |         |                 |                 |                |
| P7      | ARID1B   | chr6  | 157431633 | G   | A   | in situ  | 1736   | 22      | 17703   | 49     | 0.09    | 0.00   | 0.00    | 7.6277E-76      | Not Significant | DCIS ONLY      |
|         |          |       |           |     |     | Invasive | 405    | 145     | 234196  | 403    |         |        |         |                 |                 |                |
|         |          |       |           |     |     | Normal   | 95     | 133     | 246785  | 240    |         |        |         |                 |                 |                |
| P7      | C9orf24  | chr9  | 34382807  | G   | C   | in situ  | 11     | 3258    | 19190   | 92     | 0.14    | 0.00   | 0.00    | 6.8761E-18      | 5.2801E-02      | DCIS ONLY      |
|         |          |       |           |     |     | Invasive | 2      | 32      | 14489   | 49     |         |        |         |                 |                 |                |
|         |          |       |           |     |     | Normal   | 9      | 334     | 77171   | 74     |         |        |         |                 |                 |                |
| P8      | NCOA2    | chr8  | 71075008  | T   | C   | in situ  | 7      | 413     | 139     | 65000  | 0.01    | 0.20   | 0.00    | Not Significant | 1.4828E-03      | Pre-existing   |
|         |          |       |           |     |     | Invasive | 4      | 10052   | 66      | 39499  |         |        |         |                 |                 |                |
|         |          |       |           |     |     | Normal   | 8      | 83      | 44      | 23264  |         |        |         |                 |                 |                |
| P8      | MMP8     | chr11 | 102589262 | A   | T   | in situ  | 28146  | 38      | 6       | 1012   | 0.03    | 0.30   | 0.00    | 2.3582E-13      | 1.8028E-05      | Pre-existing   |
|         |          |       |           |     |     | Invasive | 139769 | 544     | 141     | 60075  |         |        |         |                 |                 |                |
|         |          |       |           |     |     | Normal   | 171278 | 606     | 48      | 536    |         |        |         |                 |                 |                |
| P8      | RNF182   | chr6  | 13977826  | A   | T   | in situ  | 43564  | 104     | 21      | 1320   | 0.03    | 0.29   | 0.01    | 1.5575E-02      | 3.9687E-04      | Pre-existing   |
|         |          |       |           |     |     | Invasive | 18089  | 96      | 16      | 7499   |         |        |         |                 |                 |                |
|         |          |       |           |     |     | Normal   | 16286  | 109     | 17      | 174    |         |        |         |                 |                 |                |
| P8      | LAMTOR1  | chr11 | 71809862  | C   | A   | in situ  | 442    | 125801  | 47      | 88     | 0.00    | 0.26   | 0.01    | Not Significant | 2.3879E-04      | INV ONLY       |
|         |          |       |           |     |     | Invasive | 38570  | 108833  | 42      | 73     |         |        |         |                 |                 |                |
|         |          |       |           |     |     | Normal   | 337    | 48816   | 15      | 28     |         |        |         |                 |                 |                |
| P8      | LTBP2    | chr14 | 75019600  | C   | T   | in situ  | 817    | 549025  | 111     | 8784   | 0.02    | 0.29   | 0.15    | 2.1247E-28      | Not Significant | Pre-existing   |
|         |          |       |           |     |     | Invasive | 2187   | 1148556 | 896     | 468608 |         |        |         |                 |                 |                |
|         |          |       |           |     |     | Normal   | 80     | 21492   | 23      | 3765   |         |        |         |                 |                 |                |
| P8      | SORBS2   | chr4  | 186541289 | T   | A   | in situ  | 32     | 10      | 99      | 42162  | 0.00    | 0.24   | 0.00    | Not Significant | 6.4445E-44      | INV ONLY       |
|         |          |       |           |     |     | Invasive | 2986   | 7       | 24      | 9309   |         |        |         |                 |                 |                |
|         |          |       |           |     |     | Normal   | 54     | 33      | 230     | 21864  |         |        |         |                 |                 |                |
| P8      | AKAP6    | chr14 | 33242950  | C   | G   | in situ  | 215    | 242691  | 297     | 30     | 0.00    | 0.16   | 0.00    | 2.3346E-02      | 4.6470E-04      | INV ONLY       |
|         |          |       |           |     |     | Invasive | 483    | 238533  | 43940   | 52     |         |        |         |                 |                 |                |
|         |          |       |           |     |     | Normal   | 72     | 76655   | 331     | 8      |         |        |         |                 |                 |                |
| P8      | HDAC4    | chr2  | 240078423 | C   | T   | in situ  | 1      | 335     | 0       | 0      | 0.00    | 0.01   | 0.00    | Not Significant | Not Significant | False Positive |
|         |          |       |           |     |     | Invasive | 1      | 469     | 0       | 3      |         |        |         |                 |                 |                |
|         |          |       |           |     |     | Normal   | 162    | 82716   | 4       | 30     |         |        |         |                 |                 |                |

Reference  
Variant

This table shows the results of targeted amplicon deep sequencing for a subset of the in situ-specific and invasive-specific mutations detected by exome sequencing. DeepSNV was used to determine the statistical significance of each mutation relative to the site-specific background error rate in matched normal tissues (Methods). The table columns include patient number, gene name, chromosome number, chromosome position, reference base, variant base, region, read counts for A, C, G, and T, in situ mutation frequencies (SITU\_MF), invasive mutation frequencies (INV\_MF), p-value for DeepSNV of in situ to normal comparison (p-value DN), p-value for DeepSNV invasive to normal comparison (p-value), and finally the validation results.

**Table S5. Related to Figures 6-7. Increased Mutations Frequencies in Invasions.**

| Patient | Gene     | Chr   | Position  | Ref | Var | nucleotide | AA     | Validated    | SITU_FQ | INV_FQ | POLY  | SIFT | genbank ID   |
|---------|----------|-------|-----------|-----|-----|------------|--------|--------------|---------|--------|-------|------|--------------|
| P1      | MEGF9    | chr9  | 123476336 | C   | A   | G301T      | E101X  | Not Tested   | 0.19    | 1.00   | NA    | 0    | NM_001080497 |
| P3      | NPY4R    | chr10 | 47087501  | C   | T   | C718T      | R240C  | Not Tested   | 0.48    | 1.00   | 0.332 | 0.16 | NM_001278795 |
| P5      | AHDC1    | chr1  | 27874569  | G   | A   | C4058T     | T1353M | Not Tested   | 0.33    | 1.00   | 0.983 | 0    | NM_001029882 |
| P8      | KIAA0195 | chr17 | 73489016  | C   | A   | C1919A     | T640N  | Not Tested   | 0.07    | 0.85   | 0.732 | 0.02 | NM_014738    |
| P8      | NCOA2    | chr8  | 71075008  | T   | C   | A914G      | Q305R  | Pre-existing | 0.05    | 0.60   | NA    | 0.05 | NM_006540    |
| P8      | RNF182   | chr6  | 13977826  | A   | T   | A476T      | D159V  | Pre-existing | 0.21    | 0.86   | 0.996 | NA   | NM_001165033 |
| P8      | LTBP2    | chr14 | 75019600  | C   | T   | G1187A     | R396H  | Pre-existing | 0.11    | 0.85   | 0.603 | 0    | NM_000428    |
| P8      | LAMTOR1  | chr11 | 71809862  | C   | A   | G231T      | E77D   | Pre-existing | 0.03    | 0.77   | 0.334 | 0.03 | NM_017907    |
| P8      | MMP8     | chr11 | 102589262 | A   | T   | T667A      | L223M  | Pre-existing | 0.25    | 0.88   | 0.732 | 0    | NM_002424    |

This table lists nonsynonymous mutations with increased frequencies (>0.5) in the exome data of the laser-microdissected in situ and invasive regions. The table columns list patient identifiers, gene names, chromosome and position, reference nucleotide, variant nucleotide, nucleotide position in gene, amino acid (AA) positions, amplicon deep-sequencing validation status, in situ mutation frequency adjusted by tumor purity (SITU\_FQ), invasive mutation frequency adjusted by tumor purity (INV\_FQ), polyphen2 damaging impact scores (POLY), SIFT functional impact prediction scores, GenBank identifiers, and the full gene names.

**Table S6. Related to Oligonucleotides. Primer Sequences.**

| Patient | Gene     | Chr   | Position  | Forward Primer          | Reverse Primer        |
|---------|----------|-------|-----------|-------------------------|-----------------------|
| P3      | CRY1     | chr12 | 107395083 | CTGTTAATCCTCCCCTTTCAACA | CAGGTGGAGAAACTGAAGCAC |
| P3      | DRD1     | chr5  | 174869715 | CTGCACTGGGATGAAGGAGA    | TGTAACATCTGGGTGGCCTT  |
| P4      | MYO18A   | chr17 | 27423866  | CTTGGTGTCTTGACAGCTCAG   | TCCACCTATGCTTCTGGGTC  |
| P4      | ZBTB14   | chr18 | 5291971   | GGACACATCACGCTTCTGAG    | AGATGTGTTCTTGCTGCCTG  |
| P4      | MYO18B   | chr22 | 26239717  | TGTCTGTTCCAGGGTCCTC     | AAACACAGTGCCTCCAATGC  |
| P4      | TECRL    | chr4  | 65274856  | TTGGGGCAGAGAAGAAACAC    | GGCCCTCTAAGACCAACTCC  |
| P7      | MBL2     | chr10 | 54530499  | GGGTGAAGTCAGCTCAGACC    | AGGGCTCAGAGGCTTACAGG  |
| P7      | ABCC11   | chr16 | 48226526  | GAAGAGCTTGTGTGCAGGG     | AGACCAATAGCAGCCGAGAG  |
| P7      | SCN4A    | chr17 | 62025343  | GACTCACATCCACGATGAGG    | GAGTCATTCGCACCATCCTA  |
| P7      | PCDHAS   | chr5  | 140201856 | AATGCCAGATTCGCGGTTTC    | GGGGCGTTATCATTAGCATCC |
| P7      | ARID1B   | chr6  | 157431633 | TCTTGGTTTTGCATGACTGC    | CCTTATCGCCTGAAAGCACT  |
| P7      | C9orf24  | chr9  | 34382807  | GTGCTGGGTGCAACAGATAC    | CCACCCCTATTATCCAGCAG  |
| P7      | ARHGAP36 | chrX  | 130217875 | GTGGTGCGAAGGGTGTTT      | GGCCTCACATTCTGCATAC   |
| P8      | MMP8     | chr11 | 102589262 | GCCTGAATGCCATCGATGTC    | GCTGTTTACCACCGTGTTT   |
| P8      | LAMTOR1  | chr11 | 71809862  | TGAGAAGCTTGGACTAGGGG    | GCACTGAGTCCTGTTTGTC   |
| P8      | LTBP2    | chr14 | 75019600  | CTCTCTGGCCATCTACCCTC    | GATCGTCTTCACTCCCACCA  |
| P8      | AKAP6    | chr14 | 33242950  | TCTCTCTATGTTGCAGTCCCTC  | GGCTTCCCACCTTCTTTCAA  |
| P8      | HDAC4    | chr2  | 240078423 | CTGGGCACTGACCTGTTTTT    | TTGACCAGAGTTCTCCACCC  |
| P8      | SORBS2   | chr4  | 186541289 | TGGCTGGTAAGTGTGTATCA    | ACTGGCCCTGTTCTTTCAA   |
| P8      | RNF182   | chr6  | 13977826  | CAGTCCTTCTCACAGTCCT     | GTTCCACACAGTCCAGTTGT  |
| P8      | NCOA2    | chr8  | 71075008  | ACAGCTCACGAGAACAGTCA    | GAGAGCAGCCATGAAACCAG  |

This table lists the forward and reverse oligonucleotide primer sequences used for PCR amplification of the targeted in situ-specific or invasive-specific mutations for targeted deep-sequencing.
